# Supplementary material
Source: HighWire-hosted journal article supplement (https://fmch.bmj.com/content/11/3/e001760)
Supplement: inline-supplementary-material-1 [file inline-supplementary-material-1.pdf]

**Appendix Table 1. Characteristics of pediatric patients with asthma, by household income as a percent of the US federal poverty level (FPL) (N=30,196)**

|                                                           | Under 100% FPL<br>N=23,624<br>N (%) | 100-200% FPL<br>N=4,984<br>N (%) | Above 200% FPL<br>N=1,588<br>N (%) |
|-----------------------------------------------------------|-------------------------------------|----------------------------------|------------------------------------|
| <b>Race/ethnicity</b>                                     |                                     |                                  |                                    |
| Latino                                                    | 10852 (45.9)                        | 2664 (53.5)                      | 389 (24.5)                         |
| Non-Hispanic Black                                        | 6944 (29.4)                         | 694 (13.9)                       | 222 (14.0)                         |
| Non-Hispanic White                                        | 5828 (24.7)                         | 1626 (32.6)                      | 977 (61.5)                         |
| <b>Age category at first visit</b>                        |                                     |                                  |                                    |
| <3                                                        | 5437 (23.0)                         | 1148 (23.0)                      | 345 (21.7)                         |
| 3 to 5                                                    | 4641 (19.6)                         | 1023 (20.5)                      | 251 (15.8)                         |
| 6 to 10                                                   | 7294 (30.9)                         | 1575 (31.6)                      | 521 (32.8)                         |
| 11 to 17                                                  | 6252 (26.5)                         | 1238 (24.8)                      | 471 (29.7)                         |
| <b>Sex</b>                                                |                                     |                                  |                                    |
| Male                                                      | 13194 (55.8)                        | 2822 (56.6)                      | 909 (57.2)                         |
| Female                                                    | 10430 (44.2)                        | 2162 (43.4)                      | 679 (42.8)                         |
| <b>Insurance type</b>                                     |                                     |                                  |                                    |
| Never Insured                                             | 654 ( 2.8)                          | 110 ( 2.2)                       | 53 ( 3.3)                          |
| Some Private                                              | 805 ( 3.4)                          | 393 ( 7.9)                       | 504 (31.7)                         |
| Some Public                                               | 20757 (87.9)                        | 3868 (77.6)                      | 797 (50.2)                         |
| Some Private and Public                                   | 1408 ( 6.0)                         | 613 (12.3)                       | 234 (14.7)                         |
| <b>Visits per year</b>                                    |                                     |                                  |                                    |
| <2                                                        | 8117 (34.4)                         | 1660 (33.3)                      | 540 (34.0)                         |
| 2 up to 5                                                 | 1483 ( 6.3)                         | 244 ( 4.9)                       | 89 ( 5.6)                          |
| 5 up to 10                                                | 9670 (40.9)                         | 2153 (43.2)                      | 696 (43.8)                         |
| >10                                                       | 4354 (18.4)                         | 927 (18.6)                       | 263 (16.6)                         |
| <b>Maximum Documented Asthma Severity</b>                 |                                     |                                  |                                    |
| Intermittent                                              | 8156 (34.5)                         | 1641 (32.9)                      | 522 (32.9)                         |
| Mild                                                      | 3540 (15.0)                         | 680 (13.6)                       | 188 (11.8)                         |
| Moderate or Severe                                        | 2144 ( 9.1)                         | 463 ( 9.3)                       | 131 ( 8.2)                         |
| Not documented                                            | 9784 (41.4)                         | 2200 (44.1)                      | 747 (47.0)                         |
| <b>Body Mass Index</b>                                    |                                     |                                  |                                    |
| Never overweight/obese                                    | 9272 (39.2)                         | 1967 (39.5)                      | 708 (44.6)                         |
| Sometimes overweight/obese                                | 6591 (27.9)                         | 1468 (29.5)                      | 412 (25.9)                         |
| Always overweight/obese                                   | 7761 (32.9)                         | 1549 (31.1)                      | 468 (29.5)                         |
| <b>Albuterol prescribed ever within study period</b>      |                                     |                                  |                                    |
| Yes                                                       | 20657 (87.4)                        | 4426 (88.8)                      | 1353 (85.2)                        |
| <b>Primary Language</b>                                   |                                     |                                  |                                    |
| English                                                   | 16528 (70.0)                        | 3128 (64.6)                      | 1390 (87.5)                        |
| Spanish                                                   | 7096 (30.0)                         | 1766 (35.4)                      | 198 (12.5)                         |
| <b>2010 RUCA designation of patients' primary clinics</b> |                                     |                                  |                                    |
| Urban                                                     | 23414 (99.1)                        | 4903 (98.4)                      | 1418 (89.3)                        |
| Rural                                                     | 210 ( 0.9)                          | 81 ( 1.6)                        | 170 (10.7)                         |
| <b>Neighborhood FPL</b>                                   |                                     |                                  |                                    |
| Under 100%                                                | 1591 ( 6.7)                         | 56 ( 1.1)                        | 21 ( 1.3)                          |
| ≥100% to <200%                                            | 10064 (42.6)                        | 1660 (33.3)                      | 316 (19.9)                         |
| 200% or higher                                            | 11969 (50.7)                        | 3268 (65.6)                      | 1251 (78.8)                        |

**Appendix Table 2. Characteristics of pediatric patients with asthma, by neighborhood income as a percent of the US federal poverty level (FPL) (N=30,196)**

|                                                           | Under 100% FPL<br>N=1,668<br>N (%) | 100-200% FPL<br>N=12,040<br>N (%) | Above 200% FPL<br>N=16,488<br>N (%) |
|-----------------------------------------------------------|------------------------------------|-----------------------------------|-------------------------------------|
| <b>Race/ethnicity</b>                                     |                                    |                                   |                                     |
| Latino                                                    | 290 ( 17.4)                        | 6413 (53.3)                       | 7202 (43.7)                         |
| Non-Hispanic Black                                        | 1248 ( 74.8)                       | 3529 (29.3)                       | 3083 (18.7)                         |
| Non-Hispanic White                                        | 130 ( 7.8)                         | 2098 (17.4)                       | 6203 (37.6)                         |
| <b>Age category at first visit</b>                        |                                    |                                   |                                     |
| <3                                                        | 311 ( 18.6)                        | 2981 (24.8)                       | 3638 (22.1)                         |
| 3 to 5                                                    | 349 ( 20.9)                        | 2504 (20.8)                       | 3062 (18.6)                         |
| 6 to 10                                                   | 591 ( 35.4)                        | 3710 (30.8)                       | 5089 (30.9)                         |
| 11 to 17                                                  | 417 ( 25.0)                        | 2845 (23.6)                       | 4699 (28.5)                         |
| <b>Sex</b>                                                |                                    |                                   |                                     |
| Male                                                      | 961 ( 57.6)                        | 6730 (55.9)                       | 9234 (56.0)                         |
| Female                                                    | 707 ( 42.4)                        | 5310 (44.1)                       | 7254 (44.0)                         |
| <b>Insurance type</b>                                     |                                    |                                   |                                     |
| Never Insured                                             | 50 ( 3.0)                          | 267 ( 2.2)                        | 500 ( 3.0)                          |
| Some Private                                              | 27 ( 1.6)                          | 391 ( 3.2)                        | 1284 ( 7.8)                         |
| Some Public                                               | 1548 (92.8)                        | 10671 (88.6)                      | 13203 (80.1)                        |
| Some Private and Public                                   | 43 ( 2.6)                          | 711 ( 5.9)                        | 1501 ( 9.1)                         |
| <b>Visits per year</b>                                    |                                    |                                   |                                     |
| <2                                                        | 701 ( 42.0)                        | 4046 (33.6)                       | 5570 (33.8)                         |
| 2 up to 5                                                 | 90 ( 5.4)                          | 719 ( 6.0)                        | 1007 ( 6.1)                         |
| 5 up to 10                                                | 620 ( 37.2)                        | 4889 (40.6)                       | 7010 (42.5)                         |
| >10                                                       | 257 ( 15.4)                        | 2386 (19.8)                       | 2901 (17.6)                         |
| <b>Maximum Documented Asthma Severity</b>                 |                                    |                                   |                                     |
| Intermittent                                              | 632 ( 37.9)                        | 4410 (36.6)                       | 5277 (32.0)                         |
| Mild                                                      | 341 ( 20.4)                        | 1889 (15.7)                       | 2178 (13.2)                         |
| Moderate or Severe                                        | 172 ( 10.3)                        | 1109 ( 9.2)                       | 1457 ( 8.8)                         |
| Not documented                                            | 523 ( 31.4)                        | 4632 (38.5)                       | 7576 (45.9)                         |
| <b>Body Mass Index</b>                                    |                                    |                                   |                                     |
| Never overweight/obese                                    | 748 ( 44.8)                        | 4716 (39.2)                       | 6483 (39.3)                         |
| Sometimes overweight/obese                                | 371 ( 22.2)                        | 3347 (27.8)                       | 4753 (28.8)                         |
| Always overweight/obese                                   | 549 ( 32.9)                        | 3977 (33.0)                       | 5252 (31.9)                         |
| <b>Albuterol prescribed ever within study period</b>      |                                    |                                   |                                     |
| Yes                                                       | 1421 ( 85.2)                       | 10739 (89.2)                      | 14276 (86.6)                        |
| <b>Primary Language</b>                                   |                                    |                                   |                                     |
| English                                                   | 1520 ( 91.1)                       | 7741 (64.3)                       | 11875 (72.0)                        |
| Spanish                                                   | 148 ( 8.9)                         | 4299 (35.7)                       | 4613 (28.0)                         |
| <b>2010 RUCA designation of patients' primary clinics</b> |                                    |                                   |                                     |
| Urban                                                     | 1668 (100.0)                       | 12014 (99.8)                      | 16053 (97.4)                        |
| Rural                                                     | 0 ( 0)                             | 26 ( 0.2)                         | 435 ( 2.6)                          |
| <b>Household FPL</b>                                      |                                    |                                   |                                     |
| Under 100%                                                | 1591 ( 95.4)                       | 10064 (83.6)                      | 11969 (72.6)                        |
| ≥100% to <200%                                            | 56 ( 3.4)                          | 1660 (13.8)                       | 3268 (19.8)                         |
| 200% or higher                                            | 21 ( 1.3)                          | 316 ( 2.6)                        | 1251 ( 7.6)                         |

**Appendix Table 3. Patient Characteristics – Persistent Asthma Sample**

|                                                           | Overall<br>N=6,665<br>N (%) | Latino<br>N=3,087<br>N (%) | Non-Latino Black<br>N=2,103<br>N (%) | Non-Latino White<br>N=1,475<br>N (%) |
|-----------------------------------------------------------|-----------------------------|----------------------------|--------------------------------------|--------------------------------------|
| <b>Race/ethnicity</b>                                     |                             |                            |                                      |                                      |
| <b>Age category at first visit</b>                        |                             |                            |                                      |                                      |
| <3                                                        | 1572 (23.6)                 | 914 (29.6)                 | 327 (15.5)                           | 331 (22.4)                           |
| 3 to 5                                                    | 1377 (20.7)                 | 714 (23.1)                 | 410 (19.5)                           | 253 (17.2)                           |
| 6 to 10                                                   | 2130 (32.0)                 | 971 (31.5)                 | 711 (33.8)                           | 448 (30.4)                           |
| 11 to 17                                                  | 1586 (23.8)                 | 488 (15.8)                 | 655 (31.1)                           | 443 (30.0)                           |
| <b>Sex</b>                                                |                             |                            |                                      |                                      |
| Male                                                      | 3786 (56.8)                 | 1805 (58.5)                | 1140 (54.2)                          | 841 (57.0)                           |
| Female                                                    | 2879 (43.2)                 |                            |                                      |                                      |
| <b>Insurance type</b>                                     |                             |                            |                                      |                                      |
| Never Insured                                             | 125 ( 1.9)                  | 41 ( 1.3)                  | 61 ( 2.9)                            | 23 ( 1.6)                            |
| Some Private                                              | 295 ( 4.4)                  | 51 ( 1.7)                  | 118 ( 5.6)                           | 126 ( 8.5)                           |
| Some Public                                               | 5745 (86.2)                 | 2795 (90.5)                | 1803 (85.7)                          | 1147 (77.8)                          |
| Some Private and Public                                   | 500 ( 7.5)                  | 200 ( 6.5)                 | 121 ( 5.8)                           | 179 (12.1)                           |
| <b>Visits per year</b>                                    |                             |                            |                                      |                                      |
| <2                                                        | 1135 (17.0)                 | 347 (11.2)                 | 493 (23.4)                           | 295 (20.0)                           |
| 2 up to 5                                                 | 2926 (43.9)                 | 1321 (42.8)                | 936 (44.5)                           | 669 (45.4)                           |
| 5 up to 10                                                | 1905 (28.7)                 | 1050 (34.0)                | 481 (22.9)                           | 374 (25.4)                           |
| >10                                                       | 699 (10.5)                  | 369 (12.0)                 | 193 ( 9.2)                           | 137 ( 9.3)                           |
| <b>Maximum Documented Asthma Severity</b>                 |                             |                            |                                      |                                      |
| Mild                                                      | 4106 (61.6)                 | 1931 (62.6)                | 1341 (63.8)                          | 834 (56.5)                           |
| Moderate or Severe                                        | 2559 (38.4)                 | 1156 (37.4)                | 762 (36.2)                           | 641 (43.5)                           |
| <b>Body Mass Index</b>                                    |                             |                            |                                      |                                      |
| Never overweight/obese                                    | 2382 (35.7)                 | 985 (31.9)                 | 791 (37.6)                           | 606 (41.1)                           |
| Sometimes overweight/obese                                | 2098 (31.5)                 | 1081 (35.0)                | 577 (27.4)                           | 440 (29.8)                           |
| Always overweight/obese                                   | 2185 (32.8)                 | 1021 (33.1)                | 735 (35.0)                           | 429 (29.1)                           |
| <b>Albuterol prescribed ever within study period</b>      |                             |                            |                                      |                                      |
| Yes                                                       | 6267 (94.0)                 | 2972 (96.3)                | 1940 (92.2)                          | 1355 (91.9)                          |
| <b>Primary Language</b>                                   |                             |                            |                                      |                                      |
| English                                                   | 4658 (69.9)                 | 1080 (35.0)                | 2103 (100.0)                         | 1475 (100.0)                         |
| Spanish                                                   | 2007 (30.1)                 | 2007 (65.0)                | 0 ( 0.0)                             | 0 ( 0.0)                             |
| <b>2010 RUCA designation of patients' primary clinics</b> |                             |                            |                                      |                                      |
| Urban                                                     | 6,598 (99.0)                | 3071 (99.5)                | 2101 (99.9)                          | 1426 (96.7)                          |
| Rural                                                     | 67 ( 1.0)                   | 16 ( 0.5)                  | <10 ( 0.1)                           | 49 ( 3.3)                            |
| <b>Household FPL</b>                                      |                             |                            |                                      |                                      |
| Under 100%                                                | 5301 (79.5)                 | 2373 (76.9)                | 1871 (89.0)                          | 1057 (71.7)                          |
| ≥100% to <200%                                            | 1063 (16.0)                 | 622 (20.1)                 | 175 ( 8.3)                           | 266 (18.0)                           |
| 200% or higher                                            | 301 ( 4.5)                  | 92 ( 3.0)                  | 57 ( 2.7)                            | 152 (10.3)                           |
| <b>Neighborhood FPL</b>                                   |                             |                            |                                      |                                      |
| Under 100%                                                | 481 ( 7.2)                  | 69 ( 2.2)                  | 380 (18.1)                           | 32 ( 2.2)                            |
| ≥100% to <200%                                            | 2810 (42.2)                 | 1512 (49.0)                | 882 (41.9)                           | 416 (28.2)                           |
| 200% or higher                                            | 3374 (50.6)                 | 1506 (48.8)                | 841 (40.0)                           | 1027 (69.6)                          |

Note: RUCA = rural-urban commuting area, FPL = income as a percent of federal poverty level

**Appendix Table 4. Care outcomes overall in full sample and sample with persistent asthma**

|                             | <b>Odds of having <math>\geq 2</math> asthma visits per year<br/>OR (95% CI) (N=30,196)</b> | <b>Rates of albuterol prescription<br/>RR (95%CI) (N=30,196)</b>                      |
|-----------------------------|---------------------------------------------------------------------------------------------|---------------------------------------------------------------------------------------|
| Household FPL categories    |                                                                                             |                                                                                       |
| Under 100%                  | 0.90 (0.75-1.07)                                                                            | 0.95 (0.89-1.01)                                                                      |
| $\geq 100\%$ to $< 200\%$   | 0.88 (0.74-1.06)                                                                            | 0.95 (0.90-1.01)                                                                      |
| 200% or higher              | Ref.                                                                                        | Ref.                                                                                  |
| Neighborhood FPL categories |                                                                                             |                                                                                       |
| Under 100%                  | <b>1.26 (1.12-1.41)</b>                                                                     | 0.98 (0.91-1.06)                                                                      |
| $\geq 100\%$ to $< 200\%$   | 1.05 (0.99-1.12)                                                                            | <b>1.07 (1.02-1.13)</b>                                                               |
| 200% or higher              | Ref.                                                                                        | Ref.                                                                                  |
|                             | <b>Rate of inhaled corticosteroids per year<br/>RR (95%CI) (N=6,665)</b>                    | <b>Odds of ever having inhaled corticosteroids prescribed<br/>OR 95% CI (N=6,665)</b> |
| Household FPL categories    |                                                                                             |                                                                                       |
| Under 100%                  | 0.93 (0.81-1.08)                                                                            | 1.19 (0.93-1.51)                                                                      |
| $\geq 100\%$ to $< 200\%$   | 1.00 (0.85-1.17)                                                                            | 1.24 (0.94-1.63)                                                                      |
| 200% or higher              | Ref.                                                                                        | Ref.                                                                                  |
| Neighborhood FPL categories |                                                                                             |                                                                                       |
| Under 100%                  | 1.02 (0.91-1.14)                                                                            | 1.01 (0.84-1.21)                                                                      |
| $\geq 100\%$ to $< 200\%$   | <b>1.10 (1.03-1.17)</b>                                                                     | 1.02 (0.93-1.12)                                                                      |
| 200% or higher              | Ref.                                                                                        | Ref.                                                                                  |

Note: GEE logistic and negative binomial models adjusted for age at first visit, sex, insurance, body mass index, asthma severity.

OR=adjusted odds ratio; RR=adjusted rate ratio; FPL=income as percent of federal poverty level

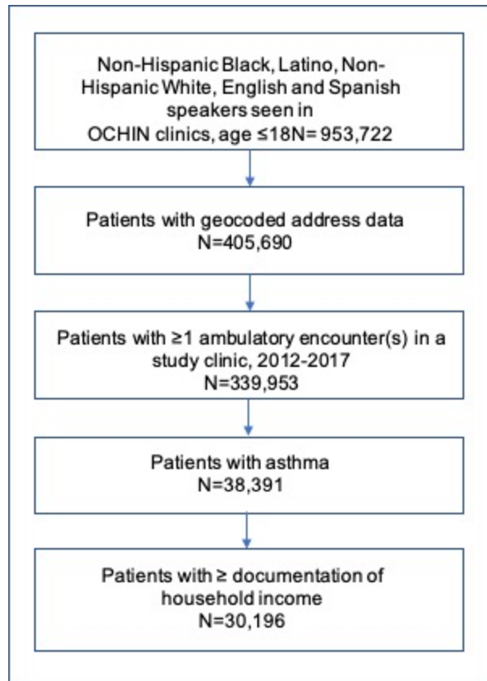

Appendix Figure 1. Study Participant Inclusion.

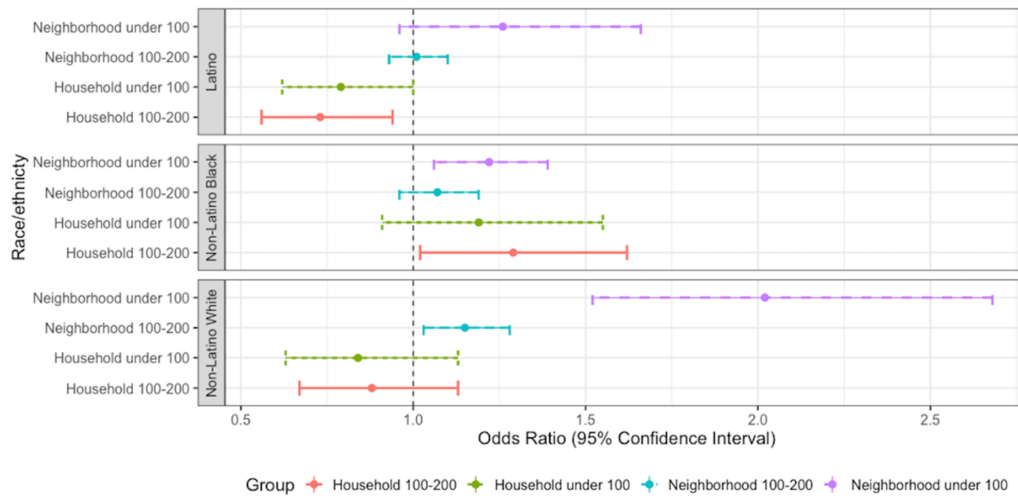

Appendix Figure 2. Odds ratios of having  $\geq 2$  asthma visits per year by race/ethnicity. Note: Y-axis labels are defined as: “Under 100” = income as percent of federal poverty level <100%; “100-200” = income as percent of federal poverty level between 100% and 200%. The reference group was  $\geq 200\%$  FPL. GEE logistic models adjusted for age at first visit, race/ethnicity, sex, insurance, body mass index, asthma severity.

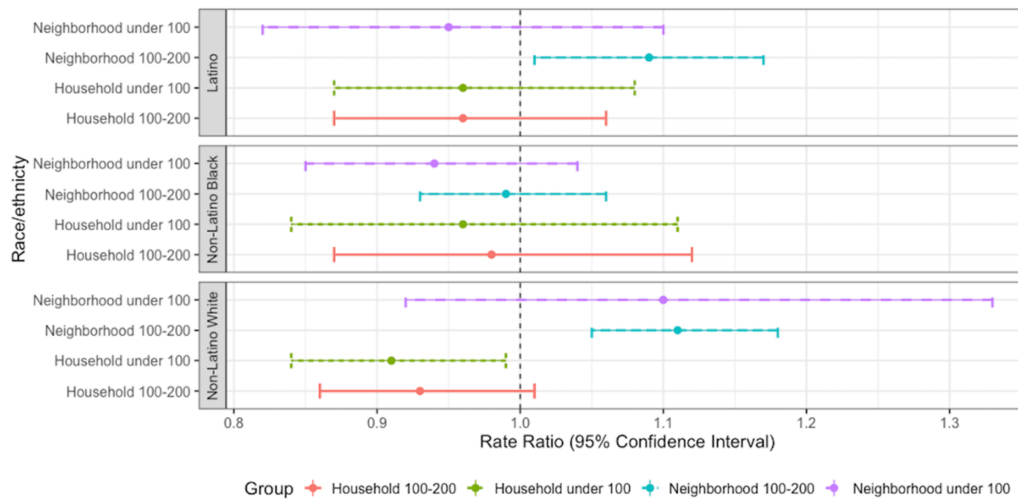

Appendix Figure 3. Rate ratios of albuterol per year by race/ethnicity.

Note: Y-axis labels are defined as: “Under 100” = income as percent of federal poverty level <100%; “100-200” = income as percent of federal poverty level between 100% and 200%. The reference group was  $\geq 200\%$  FPL. GEE negative binomial models adjusted for age at first visit, sex, insurance, visits per year, body mass index, asthma severity.
